# Supplementary material
Source: PubMed Central journal article supplement (PMC2878131)
Supplement: NIHMS197937-supplement-SI.pdf [file NIHMS197937-supplement-SI.pdf]

**In crystallo posttranslational modification within a MauG/pre-methylamine  
dehydrogenase complex**

Lyndal M. R. Jensen, Ruslan Sanishvili, Victor L. Davidson and Carrie M.  
Wilmot

**Supporting Online Material**

Materials and Methods

Figures S1 to S5

Tables S1 to S2

References

## SUPPORTING ONLINE MATERIAL

### MATERIALS AND METHODS

#### Protein expression and purification

The methods for homologous expression of MauG in *Paracoccus denitrificans* and its purification were as described previously (S1). PreMADH, the biosynthetic precursor of methylamine dehydrogenase, was heterologously expressed in *Rhodobacter sphaeroides* and purified as described previously (S2).

#### Crystallization and X-ray data collection

Crystallization conditions for the MauG-preMADH complex were established using Crystal Screen (Hampton Research, CA) for vapor diffusion by the hanging drop method. Crystals were initially obtained in drops containing a 2:1 ratio (by volume) of the pre-formed protein mixture (100  $\mu$ M MauG and 50  $\mu$ M preMADH in potassium phosphate buffer, 10mM at pH 7.5) relative to the reservoir solution. Using the sparse matrix Crystal Screen (Hampton Research, CA), initial crystals were obtained from reagent #28 (30 % w/v PEG 8000, 0.2 M sodium acetate, 0.1 M sodium cacodylate pH 6.5). Optimization of the precipitant solution and drop contents led to reproducible crystallization in drops containing protein (1  $\mu$ L)/reservoir solution mixture with ratios (by volume) of 1:2 through 1:3.5. The final crystallization conditions for the diferric MauG-preMADH complex were 24-30 % w/v PEG 8000, 0.1 M sodium acetate and 0.1 M MES pH 6.4 at 20 °C. Crystals appeared within a few days and were fully grown after ~ 2 weeks. Crystals were cryo-protected by including 10% PEG 400 in an artificial mother liquor equivalent to the crystallization conditions for the particular crystal. X-ray diffraction data were collected at 100K on GM/CA-CAT beamline 23-ID-B of the Advanced Photon Source (APS), Argonne National Laboratory, Argonne IL. The crystals are triclinic (P1), with unit cell parameters of  $a = 55.5 \text{ \AA}$ ,  $b = 83.5 \text{ \AA}$ ,  $c = 107.8 \text{ \AA}$ ;  $\alpha = 109.9^\circ$ ,  $\beta = 91.5^\circ$ ,  $\gamma = 105.8^\circ$ , and one complex of 203.6 kDa (2 MauG : 1  $\alpha_2\beta_2$ preMADH) in the asymmetric unit. The low symmetry of the crystals equates to a high X-ray dose to collect a complete dataset, and the diffraction resolution deteriorated significantly during the required 180° of data collection using a 10  $\mu$ m mini-beam, defined by a combination of focusing and a 10  $\mu$ m aperture (S3). However the crystals are rods (approx. 70  $\mu$ m x 15  $\mu$ m x 10  $\mu$ m), and this enabled the collection of multiple datasets from one crystal. When diffraction quality deteriorated (as judged by scaling statistics for processed data), the crystal was translated to a non-irradiated part and data collection continued. Four wedges of data measured from different parts of the same crystal were processed and merged with HKL2000 to compile a complete dataset (S4). Due to the use of the 10  $\mu$ m X-ray mini-beam, a UV/visible single crystal spectrum could not be measured following diffraction data collection to assess possible X-ray induced redox changes at the MauG hemes. As the incident light beam of the UV/visible single crystal microspectrophotometer (4DX Systems AB, Sweden) has a cross-section of at least 25  $\mu$ m at the crystal, significant regions of non-irradiated crystal contribute to the UV/visible spectrum. Therefore, it is not known whether the oxidation state of the heme

irons remained Fe(III) during X-ray data collection or were partially or fully reduced to Fe(II). Data collection statistics are given in Table S1.

For reaction with H<sub>2</sub>O<sub>2</sub>, MauG-preMADH crystals were soaked for ~ 2 minutes in a freshly prepared solution containing H<sub>2</sub>O<sub>2</sub> (2 mM) in an artificial mother liquor equivalent to the crystallization conditions for the particular crystal, which also included 10 % v/v PEG 400 (the cryoprotectant). The crystals were cryo-cooled by direct transfer into liquid nitrogen and diffraction data collected at beamline 23-ID-B. The crystals diffracted to the same resolution as the untreated MauG-preMADH crystals. A different general strategy was used for data collection in this case. Even good quality protein crystals are not completely homogeneous and can have better-ordered regions (S5). A rastering function was used to evaluate the crystal quality throughout data collection. For the data presented here, the crystal showed good diffraction without the need to preclude any significant regions. The beam size was adjusted (w = 60 μm, h = 50 μm) to match the crystal size and orientation, and a complete 360° of diffraction data were collected. Data collection statistics are given in Table S1.

### Structure solution

The crystal structure of the native MauG-preMADH complex was solved by molecular replacement into a 2.1 Å dataset using PHASER from the CCP4 program suite (S6, S7). Of the known di-heme CCP crystal structures, the closest sequence homolog to *P. denitrificans* MauG is di-heme CCP from *Nitrosomonas europaea* (NeCCP) with 28% sequence identity, and a crystal structure solved to 1.8 Å resolution [PDB code 1IQC] (S8). This structure was used to generate the search model for MauG. Sequence alignments suggested some large loop insertions in MauG (Fig. S2). Therefore, a stripped-down di-heme CCP search model was used that retained only the core tertiary fold and conserved side-chains. Non-conserved amino acids and the *c*-type hemes were excluded from the model (S1, S9). The initial search used both the α<sub>2</sub>β<sub>2</sub> heterotetramer of mature PD-MADH and the heme-free NeCCP model. Following placement of the NeCCP and PD-MADH models, rigid body refinement yielded R<sub>work</sub> = 42.3% (R<sub>free</sub> = 42.1%). Refinement of the model was carried out using REFMAC5.5 (S10). During refinement no distance restraints were used between the heme irons and axial ligands. Model building and calculation of non-crystallographic symmetry (NCS) averaged electron density maps were carried out in COOT (S11). Two-fold NCS-averaged electron density maps were used to guide model building in the early stages, and also as restraints during refinement. Tight NCS restraints were used during refinement until most residues were located. As refinement continued, the NCS target restraints were weakened but not completely removed until the R<sub>work</sub> = 18.4 % and R<sub>free</sub> = 22.9 %. TLS refinement was introduced when R<sub>work</sub> = 17.3 % and R<sub>free</sub> = 21.8 % (S12). At this stage the model building was completed using electron density maps without NCS-averaging. Refinement was continued until all interpretable features of the 2Fo-Fc and Fo-Fc electron density were modeled. All the diffraction data to 2.0 Å resolution were used to calculate electron density maps and in refinement (Table S1). However due to the incompleteness in the 2.08-2.01 Å resolution shell (69%) the structure is reported as a 2.1 Å resolution structure (85% in 2.17-2.08 Å resolution shell). The final R<sub>work</sub> = 13.5 % and R<sub>free</sub> = 18.9 %, and the

model has good stereochemistry assessed with COOT (*S11*). The data refinement statistics are given in Table S1.

The H<sub>2</sub>O<sub>2</sub>-treated MauG-preMADH crystals were isomorphous to the untreated ones. Therefore, the model of the untreated protein could be refined directly against the diffraction data from the treated crystals. The reflection equivalents used to calculate R<sub>free</sub> in the refinement of the untreated crystals were used to calculate R<sub>free</sub> during refinement of the dataset for the H<sub>2</sub>O<sub>2</sub>-treated crystals. Additional reflections in the H<sub>2</sub>O<sub>2</sub>-treated dataset that were not measured in the untreated crystal dataset were randomly assigned to contribute either to R<sub>work</sub> or R<sub>free</sub>. To help prevent bias the heme models were removed, and the preMADH β-subunit residues 57 and 108 were truncated to their main-chain atoms only. Rigid body refinement with each of the six polypeptide chains defined as rigid domains gave R<sub>work</sub> = 19.9 % and R<sub>free</sub> = 22.7 %. The inclusion of TTQ in the model was well supported by both the 2Fo-Fc and Fo-Fc maps (Fig. 2B). Model building and restrained refinement using REFMAC5.5 with TLS until all interpretable regions of the 2Fo-Fc and Fo-Fc electron density maps were explained led to a final R<sub>work</sub> = 14.2 % and R<sub>free</sub> = 19.4 % (*S10*). The data refinement statistics are given in Table S1.

### **Enzyme characterization in solution**

The MauG-dependence of TTQ synthesis by H<sub>2</sub>O<sub>2</sub> has been demonstrated previously by monitoring the formation of the quinone by UV-Vis spectroscopy (*S13*). There was the possibility that components of the crystallization condition used to grow MauG-preMADH crystals might enable H<sub>2</sub>O<sub>2</sub>-dependent TTQ synthesis in the absence of MauG. To check for this the experiments were repeated in a medium that matched the crystal growth solution. A bulk sample of crystallization solution was prepared; 24 % w/v PEG 8000, 0.1 M MES pH 6.4 and 0.1 M sodium acetate. Stock solutions in 50 mM potassium phosphate buffer, pH 7.5 of 5 μM preMADH in the presence and absence of 0.5 μM MauG were diluted in the crystallization solution to obtain a volume ratio of 1:3 KPi to crystallization solution. A solution of 100 μM H<sub>2</sub>O<sub>2</sub> was added to each sample with mixing, and the UV-Vis spectrum recorded at minute intervals. Only in the presence of MauG was TTQ formed (monitored at 440 nm) following H<sub>2</sub>O<sub>2</sub> addition (Fig. S4).

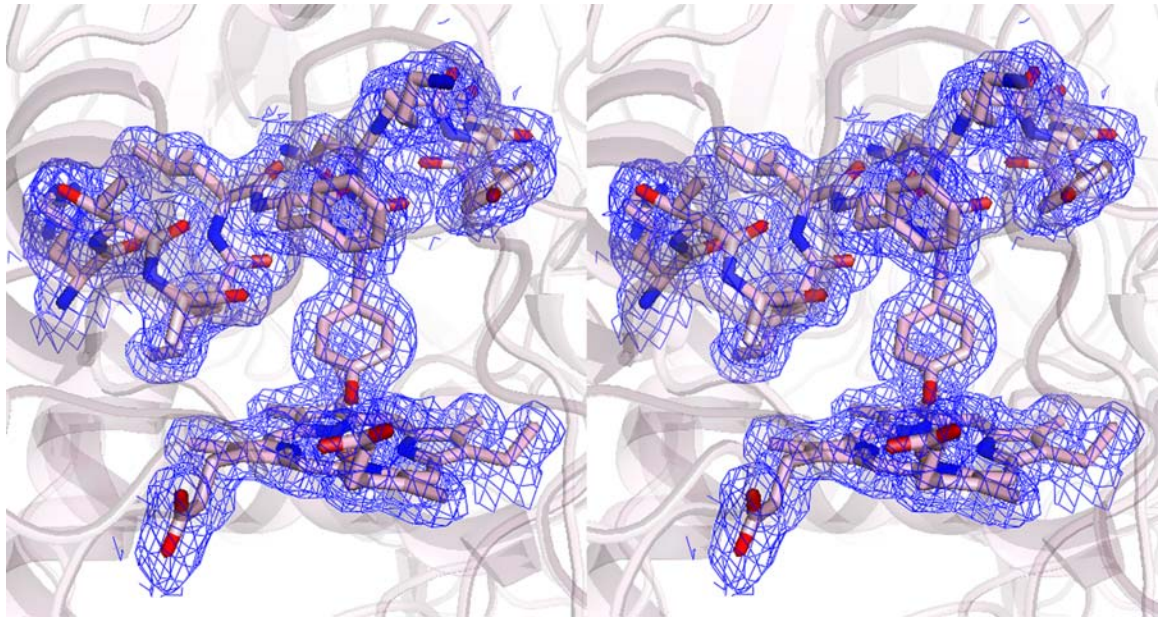

**Figure S1:** Wall-eye stereo image showing the quality of 2Fo-Fc electron density (contoured at  $1.5 \sigma$ ) within the C-terminal half of MauG. Figure produced using PyMOL (<http://www.pymol.org/>).

MauG-PD -----EQAR-----PADDALAAALGAQLFF 19  
MauG-MF -----ADLPPRESYQRPADIPSPDN-----PLTIEKAALGKTLFF 36  
MauG-ME VTTCSGAATATADASQQDLAALKARFRRPESVPHPKAN-----PLTPEKVALGKALFF 53  
MauG-MM -----AWSANLPPREKFKRPDSIPAPLSN-----PLTLEKATLGKTLFF 39  
CCP-PD -----QTEAIDDSALREEAKGVFEALPEKMTAIKQTEENPEGIALTAEKIELGKMLFF 53  
CCP-PA -----DALHDQASALFKPIPEQVTELRGQ-----PISEQQRELGKMLFF 39  
CCP-NE1 -----ANEPIQPIKAVTPEN-----ADMAELGKMLFF 27  
CCP-RR -----DDLRAKAKEVFEVIPTSVPEIKGN-----AITPARIELGRKLEFF 39  
CCP-RS -----ALRDKALGYFAPLPSTVPAVKDN-----RITPEKIELGKALFF 38  
CCP-NE2 -----NYTQSFEPPLVPSIIDETKN-----VALIALGKKLYL 31  
CCP-NW -----DN-----PMTAAKVELGRRLFF 17

\*\* \*:

MauG-PD DPALSRNATQSCAT<sup>♦</sup>CHDPARAFTDPREGKAGLAVSVGDDGQSHGDRNTPTLGYAALVPAF 79  
MauG-MF DPRLSRDGSMSCAT<sup>♦♦</sup>CHNPGMRWSDGRILPLRADGVEHA-----RRTPTVLNSAWLTTL 89  
MauG-ME DPRLSRSGSVSCAT<sup>♦♦</sup>CHNPSLGWSDGLTRAVGFGMVPLP-----RRTPPVLNLAWGTAF 106  
MauG-MM DQRLSRSGGMACAT<sup>♦♦</sup>CHSPDQRWSDGRTLPLQAESVSNA-----RRTPTVLNSAWLSAL 92  
CCP-PD DPRMSSSGLIS<sup>♦</sup>Q<sup>♦</sup>TCHNVGLGGVDGLPTSIGHGWQRGP-----RNAPTMLNAIFNAAQ 106  
CCP-PA DPRLSRSHVLS<sup>♦</sup>NC<sup>♦</sup>TCHNVGTGGADNVPTSIGHGWQKGP-----RNSPTVFNVAVNAAQ 92  
CCP-NE1 DPRLSRSGFIS<sup>♦</sup>C<sup>♦</sup>NSCHNLSMGGTDNITTSIGHKWQGP-----INAPTVLNSVMNLAQ 80  
CCP-RR DPRLSRSGLIS<sup>♦</sup>NC<sup>♦</sup>TCHNLGMGGDNLETSIGHGWQKGP-----RNAPTVLNAVFNIAQ 92  
CCP-RS DPRLSASGVFSC<sup>♦</sup>YS<sup>♦</sup>CHNLTTGGGDNLETSIGHGWQKGP-----RNAPTVLNAVLENAQ 91  
CCP-NE2 DPRLSIDDTIS<sup>♦</sup>C<sup>♦</sup>NSCHQLDNFGVDNQPTSPGHGRRGG-----RNAPTTFNAALQIAQ 84  
CCP-NW DADLSVDGTMSCAT<sup>♦</sup>CHVQKHAFA<sup>♦</sup>DSTRTRPGVTDEPGR-----RNVFGLANVAWFTPL 70

\* :\* . :\* :\*\* \* . \*

MauG-PD HRDANGKYKGGQFWDGRADDLKQ<sup>•</sup>QAGQPM LN--PVEMAMPDRAA<sup>•</sup>VAAR-LRDDPAYRTGF 136  
MauG-MF M-----WDGRATSL<sup>•</sup>EDQAILPITTAHEMNFEMP----LLLNR<sup>•</sup>LKDVAGYAPLF 133  
MauG-ME Q-----WDGRADSL<sup>•</sup>EAQARMPITAPDEMNM<sup>•</sup>SMD----LVVER<sup>•</sup>LKAVPGYAPLF 150  
MauG-MM M-----WDGRATTL<sup>•</sup>EEQAVLPITTAHEMNF<sup>•</sup>DLA----SLVSR<sup>•</sup>LQRIEGRPLF 136  
CCP-PD F-----WDGRAGDL<sup>•</sup>AEQAKGPVQA--GVEM<sup>•</sup>SNT--PDQVVQTINSMP<sup>•</sup>EYVDAF 150  
CCP-PA F-----WDGRAKDL<sup>•</sup>G<sup>•</sup>EQAKGPIQN--SVE<sup>•</sup>MHST--PQLVEQ<sup>•</sup>TLGSIP<sup>•</sup>EYVDAF 136  
CCP-NE1 F-----WDGRAKDL<sup>•</sup>KEQAAGPIAN--PKEM<sup>•</sup>AST--HEIAEK<sup>•</sup>VVASMPQYRERF 124  
CCP-RR F-----WDGRAEDL<sup>•</sup>R<sup>•</sup>TQAKGPVQA--GVEM<sup>•</sup>AST--PERVVATL<sup>•</sup>KSMPEYVADF 136  
CCP-RS F-----WDGRADDL<sup>•</sup>KAQAKGPVQA--GVEM<sup>•</sup>ANT--PGQVEV<sup>•</sup>TL<sup>•</sup>KS<sup>•</sup>LPQYVDWF 135  
CCP-NE2 F-----WDGRARNV<sup>•</sup>EEQALSQILN--PIEM<sup>•</sup>GMAN--EEAVI<sup>•</sup>SKLKKI<sup>•</sup>DEYQTMF 129  
CCP-NW N-----FADPAATL<sup>•</sup>EMQAATPVFGTHPVEM<sup>•</sup>GMAGREAEIGRRFGRD<sup>•</sup>SCYQTMF 119

\* \* : \*\* : : : . \* \*

MauG-PD EALFGKGV-LDDPERAFDAAA<sup>•</sup>EALAA<sup>•</sup>YQATGEFSPFDSKYDRVMR<sup>•</sup>GEE-KFTPLEEF<sup>•</sup>GYT 194  
MauG-MF ARAFGDAE-----ITEKRLTQALAS<sup>•</sup>FORT--LVSKLAP<sup>•</sup>FDVWVEGD<sup>•</sup>ESAMSERAKRGFA 185  
MauG-ME RNAFGSEEP-----IGARHVTAALAT<sup>•</sup>FORT--LVS<sup>•</sup>GEAP<sup>•</sup>FDRWALG<sup>•</sup>DESAIGADAKRGFA 203  
MauG-MM TQAFGDDS-----ISQQRITQALAS<sup>•</sup>FORT--LVS<sup>•</sup>NIAP<sup>•</sup>FDRWVAG<sup>•</sup>DEQAISESAKRGFA 188  
CCP-PD KAAFPD----EAEPVSFDNFAVAIEQ<sup>•</sup>FEAT--LITPNSA<sup>•</sup>FDRFLAG<sup>•</sup>DDAAMSDQ<sup>•</sup>QKRLQ 204  
CCP-PA RKA<sup>•</sup>FPK----AGKPV<sup>•</sup>SFDNMALAI<sup>•</sup>EAYEAT--LVT<sup>•</sup>PDSP<sup>•</sup>FDLYLKG<sup>•</sup>DDKALDAQ<sup>•</sup>QKGLK 190  
CCP-NE1 KKV<sup>•</sup>FG-----SDEVTIDRITTAIAQ<sup>•</sup>FEET--LVT<sup>•</sup>PGSK<sup>•</sup>FDKWLE<sup>•</sup>GDKNALN<sup>•</sup>QDELEGYN 176  
CCP-RR KAAFRD----DPDPVSFDNMAKAI<sup>•</sup>EIYEAT--LIT<sup>•</sup>PD<sup>•</sup>SK<sup>•</sup>FDKWL<sup>•</sup>AGDDASMT<sup>•</sup>KLETAGLS 190  
CCP-RS AA<sup>•</sup>AFPG----EPEPTSFDNMAKAI<sup>•</sup>EAFEAT--LIT<sup>•</sup>P-AP<sup>•</sup>FD<sup>•</sup>AF<sup>•</sup>LN<sup>•</sup>GDDAAL<sup>•</sup>TEDQ<sup>•</sup>RAGLD 188  
CCP-NE2 AE<sup>•</sup>AFKD----EKDPIQYKNIGKAI<sup>•</sup>GAFERT--LIT<sup>•</sup>P-SR<sup>•</sup>FDD<sup>•</sup>FLR<sup>•</sup>GDENAL<sup>•</sup>NAAEK<sup>•</sup>RGLK 182  
CCP-NW ARA<sup>•</sup>FPE----DGGRIDFSNVARA<sup>•</sup>LAS<sup>•</sup>FERT--LISHG<sup>•</sup>SAWDR<sup>•</sup>QLG<sup>•</sup>P-----EAQAGS 166

\* : : \* : . : : \*

● ◆ ◆ ◆  
MauG-PD VFIT---WNCRLCHMQRKQGV AERETFTNF EYHNI GLPVNETAREASGLGADHVDHGLLA 251  
MauG-MF VFKG--KARCATCHSSWRFTDDSFHDI GLPS-----LDPGRGA 221  
MauG-ME LFTG--KAGCAACHSTWRFTDDSFHDI GLKAG-----NDLGRGK 240  
MauG-MM VFNDKNKANCVA CHSSWRFTDDSFHDI GLPS-----KDLGRGA 226  
CCP-PD AFIE---TGCTACHYGINLGGQDYHPFGLIARPGA EV-----LPAGDKGRYE 248  
CCP-PA AFMD---SGCSACHNGINLGGQAYFPFGLVKKPDASV-----LPSGDKGRFA 234  
CCP-NE1 LFKG---SGCVQCHNGPAVGGSSYQKMGVFKPYETKN-----PAAG---RMD 217  
CCP-RR LFLD---KGCACHNGVNI GGNGYYPFGVVEQPGADI-----LPVADKGRFA 234  
CCP-RS LFLD---KGCSTCHSGVNVGGHGYYPFGLIEKPGADI-----LPEGDKGRFA 232  
CCP-NE2 KFVY---MRC SNCHHGIAIGGNSYKKI GLFEP-----YETSDLGRYE 221  
CCP-NW ALFA---RDCASCHSG-----SNFTDLT MHR LGP-----ADPALADQGLFE 204  
: \* \*\* :

■  
MauG-PD RPGIEDPAQSGRFKVP SLRNVAVTGPYMHNGVFTDLRTA I L F Y N K Y T S R R P E A K I N P E T G 311  
MauG-MF RVPPQVTIMQHAFKTP TLRDLPRNGPFMH D G S M H S L D E V T R H Y E Q G G L Q R P - S I S A E M K R 280  
MauG-ME FAPPSVTAMRYAFKTP SLRDLRMEG P Y M H D G Q L G S L E A V L D H Y I K G G E K R P - S L S F E M K P 299  
MauG-MM KVPSQVTLMQHAFKTP SLRDL SIDG P Y M H D G S I R G L K T V I K H Y K S E A I Q R E - S L S K D M Q K 285  
CCP-PD ISQTAD--DEYVFR A A P L R N V A L T A P Y F H S G V V W D L A E A V Q I M S S A -----QIG 295  
CCP-PA VTKQS--DEYVFR A A P L R N V A L T A P Y F H S G V W E L K D A V A I M G N A -----QLG 281  
CCP-NE1 VTGNEA--DRNVFR A A P L R N I E L T Y P Y F H D G G A A T L E Q A V E T M G R I -----QLN 264  
CCP-RR VTKTAT--EEYVFR A G P L R N I A L T A P Y F H S G K V W D L E Q A V A V M G S S -----QLG 281  
CCP-RS VTATVD--DEYVFR A A P L R N V A V T A P Y F H S G K V W D L K T A V T I M A E S -----QLG 279  
CCP-NE2 VTGLEA--DKGVFR A A P L R N V A K T A P Y F H D G S V A T L D E A I K K M A R Y -----QLG 268  
CCP-NW KTGID--ADRGKFRTP SLRNIALTGPWWHDGSAWTLDEA I A R H -----G 246  
\* : . \*\* : : \* : \* . \* \* : . :

MauG-PD APWGEPEVARNLSLAELQSG LMLDDGRVDALVAFLET LTDRRYEPLLEESRAAQKD 367  
MauG-MF FELTETEREYLIEFIHTLDG-----GLLDIEPPQLPE----- 312  
MauG-ME FEMSERERRDLVAFLET LKA-----EPAAITLPQLP----- 330  
MauG-MM FELSNLEESDLIAFIQSLDG-----GALKIQAPMMPE----- 317  
CCP-PD TELTDQQANDITAF LGALTG---EQPVIDHPILPVRTD T T P L P T P M ----- 338  
CCP-PA KQLAPDDVENIVAF LHSLSG---KQPRVEYPLLPASTETTPRPAE----- 323  
CCP-NE1 REFNKDEVSKIVAF LKTLTG---DQPDFKLPILPPSNNDTPRSQPYE----- 308  
CCP-RR ETLSESDVKAITAF LTTLTG---VMPKVEYPILPVSTRET PKPEGM----- 324  
CCP-RS ETMSDQEVGQVVAFL ESLTG---TMPPVTL PVLPAETAGT PRPTAEIRVE----- 326  
CCP-NE2 RDVDPSFIKDVKAFLGSLTS---KQ----- 290  
CCP-NW LTHGAADVAQLIAFLGALS-----DTEFTQRKSLAMPEDACGKRL 286  
:

**Figure S2:** Multiple sequence alignment for MauG proteins from methylotropic and autotrophic bacteria and bacterial di-heme cytochrome *c* peroxidase proteins. Protein codes indicate the organism as follows: MauG from *Paracoccus denitrificans* (MauG-PD), *Methylobacillus flagellatus* (MauG-MF), *Methylobacterium extorquens* (MauG-ME), *Methylophilus methylotrophus* (MauG-MM); cytochrome *c* peroxidase from *Paracoccus denitrificans* (CCP-PD), *Pseudomonas aeruginosa* (CCP-PA), *Nitrosomonas europaea* (CCP-NE1), *Rhodospirillum rubrum* (CCP-RR), *Rhodobacter sphaeroides* (CCP-RS), *Nitrosomonas eutropha* (CCP-NE2), *Nitrobacter winogradskyi* (CCP-NW). Alignment was done using the ClustalW2 (Clustal 2.0.11) online program hosted by the European Bioinformatics Institute ([www.ebi.ac.uk/Tools/clustalw2/index.html](http://www.ebi.ac.uk/Tools/clustalw2/index.html)). Alignment selections were: matrix = blosum, gap open = 10, gap extension = 0.05 and gap distance = 8. The signal sequences were removed in accordance with either the processed signal sequences listed on the UniProt Consortium website ([www.uniprot.org](http://www.uniprot.org)) or else previously reported in a published sequence alignment (S9). Residues that are identical in all of the sequences are indicated with an asterisk and highlighted in yellow. Residues that are of similar size and chemical properties (eg. hydrophobic, polar or acidic groupings) and/or are identical in most of the sequences are indicated with a colon and highlighted in green. Residues of similar chemical properties are indicated with a period. The CXXCH motifs that indicate the location of the *c*-type hemes are identified by red diamonds for the conserved residues (regions 31-35 and 201-205 for MauG-PD). The Tyr294 axial ligand for the six-coordinate heme of the MauG proteins (Met or His for di-heme CCP proteins) is indicated with a red square. The Trp93 and Trp199 residues that are implicated in ET in MauG-PD are indicated with blue circles.



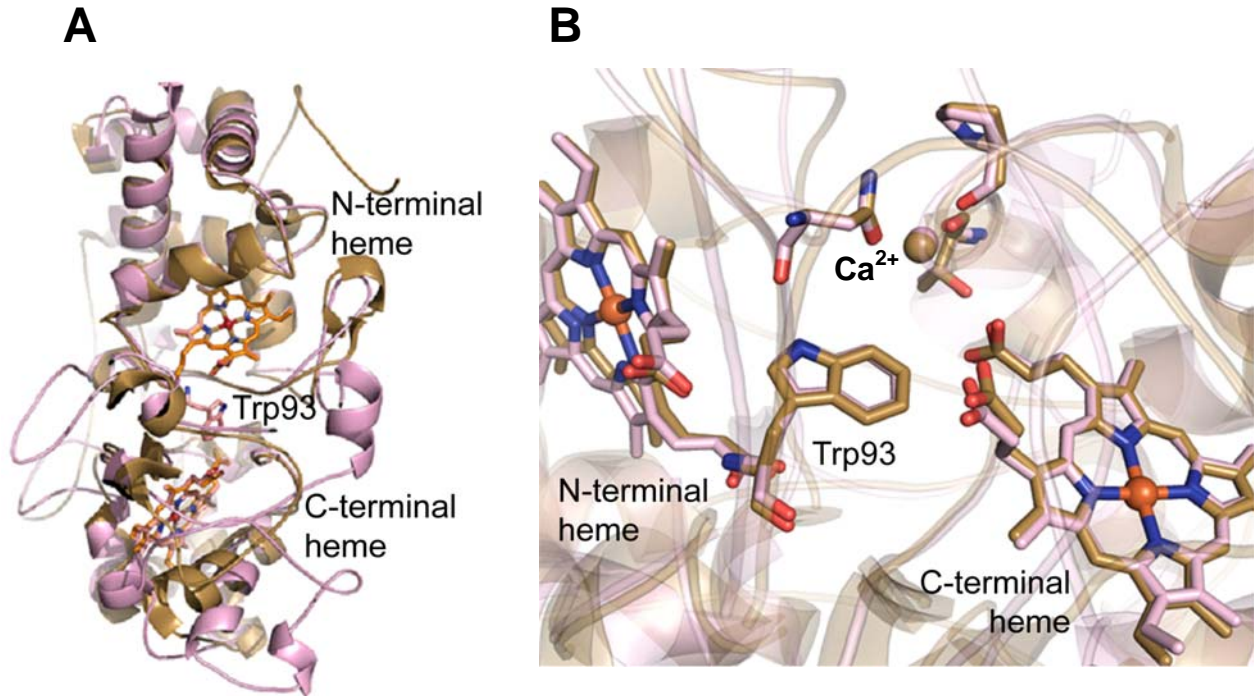

**Figure S3.** Overlay of MauG and *Nitrosomonas europaea* di-heme cytochrome *c* peroxidase (NeCCP). (A) Overall fold represented as a secondary structure cartoon. MauG is colored pink, NeCCP is colored gold. Hemes and intervening Trp (93 in MauG) are shown as sticks colored by element, with MauG carbons pink, and NeCCP carbons gold. Iron is shown as an orange sphere. The N-terminal and C-terminal hemes of MauG are equivalent to the peroxidatic (P-) and electron-transfer (E-) hemes respectively of di-heme CCPs. (B) Enlarged view showing the overlay of the hemes, intervening Trp93 and conserved Ca<sup>2+</sup> binding site. Colors are as in panel A, with the MauG Ca<sup>2+</sup> as a pink sphere, and the NeCCP Ca<sup>2+</sup> gold. Figure produced using PyMOL (<http://www.pymol.org/>).

## MauG-dependent TTQ Biosynthesis

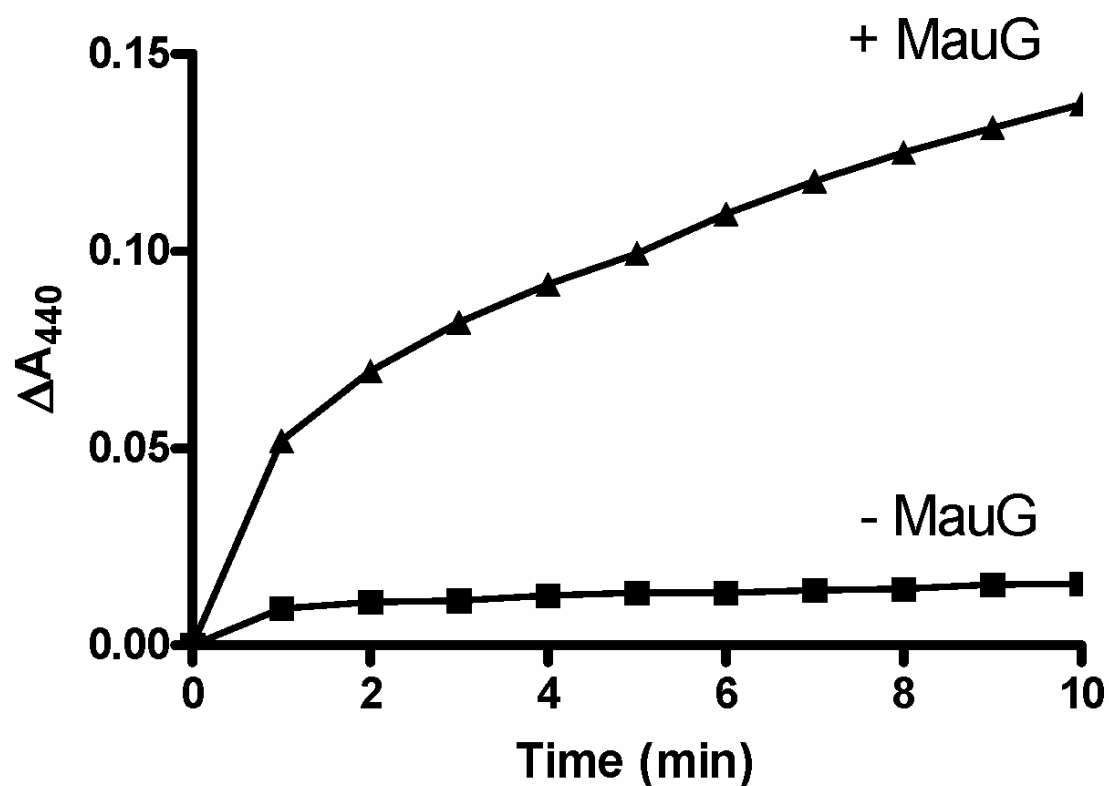

**Figure S4.** Time-course for MauG-dependent formation of TTQ in preMADH (monitored at 440 nm) by addition of 20-fold excess  $H_2O_2$  in the presence of the crystallization solution.  $\blacksquare$ — $\blacksquare$  MauG was absent from the solution assay.  $\blacktriangle$ — $\blacktriangle$  MauG was present in a 1:10 molar ratio of MauG to preMADH.

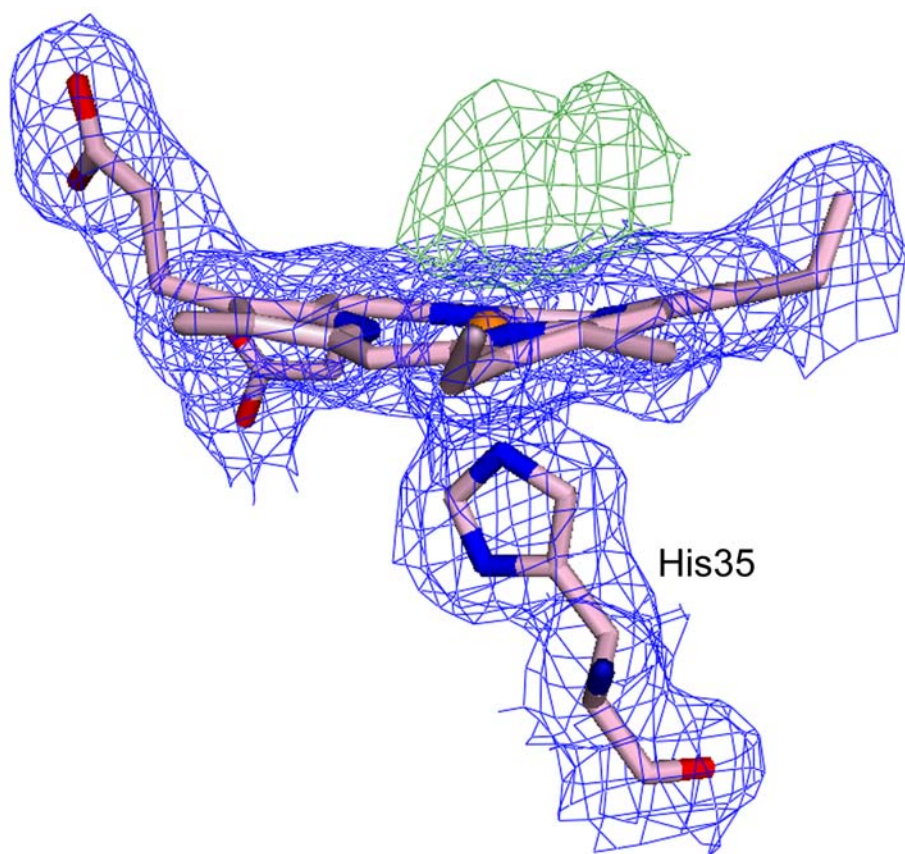

**Figure S5.** 2Fo-Fc (blue) and positive Fo-Fc electron density (green) at the MauG N-terminal heme (HEC500) in the MauG-preMADH + H<sub>2</sub>O<sub>2</sub>-treated crystal diffraction data. The 2Fo-Fc electron density is contoured at 1.5  $\sigma$ , whilst the Fo-Fc is contoured at 3.0  $\sigma$ . Figure produced using PyMOL (<http://www.pymol.org/>).

**Table S1.** Data collection and refinement statistics.<sup>a</sup>

| <b>Data collection</b>                                      | <b>MauG-preMADH</b>             | <b>H<sub>2</sub>O<sub>2</sub>-soaked MauG-preMADH</b> |
|-------------------------------------------------------------|---------------------------------|-------------------------------------------------------|
| Detector type                                               | MAR <i>mosaic</i> 4x4 tiled CCD | MAR <i>mosaic</i> 4x4 tiled CCD                       |
| Source                                                      | APS, Sector 23                  | APS, Sector 23                                        |
| Space group                                                 | <i>P1</i>                       | <i>P1</i>                                             |
| Unit cell lengths (Å)                                       | 55.53 x 83.52 x 107.78          | 55.53 x 83.52 x 107.78                                |
| Unit cell angles (°)                                        | 109.94, 91.54, 105.78           | 109.94, 91.54, 105.78                                 |
| Wavelength (Å)                                              | 1.02665                         | 1.03320                                               |
| Resolution (Å)                                              | 50.00 – 2.01 (2.08 – 2.01)      | 50.00 – 2.05 (2.09 – 2.05)                            |
| Measured reflections                                        | 245,905                         | 421,716                                               |
| Unique reflections                                          | 105,427                         | 106,328                                               |
| Completeness (%)                                            | 93.1 (68.6)                     | 98.1 (97.0)                                           |
| R <sub>merge</sub> (%) <sup>b</sup>                         | 6.7 (17.6)                      | 7.0 (40.4)                                            |
| I/σI                                                        | 10.7 (4.3)                      | 18.4 (3.4)                                            |
| Multiplicity                                                | 2.3 (1.7)                       | 4.0 (3.8)                                             |
| <b>Refinement</b>                                           |                                 |                                                       |
| Resolution (Å)                                              | 44.50 – 2.02 (2.07 – 2.02)      | 38.21 – 2.05 (2.10 – 2.05)                            |
| No. reflections; working/test                               | 100,125/5,298                   | 101,009/5,304                                         |
| R <sub>work</sub> (%) <sup>c</sup>                          | 13.5                            | 14.2                                                  |
| R <sub>free</sub> (%) <sup>d</sup>                          | 18.9                            | 19.4                                                  |
| Protein atoms                                               | 13256                           | 13248                                                 |
| Other atoms                                                 | 1511                            | 1475                                                  |
| Ramachandran statistics <sup>e</sup>                        |                                 |                                                       |
| Allowed (%)                                                 | 99.29                           | 99.29                                                 |
| Outliers (%)                                                | 0.71                            | 0.71                                                  |
| Root mean square deviation                                  |                                 |                                                       |
| Bond lengths (Å)                                            | 0.023                           | 0.023                                                 |
| Bond angles (°)                                             | 2.020                           | 1.971                                                 |
| Average B-factor (Å <sup>2</sup> )                          | 15.17                           | 21.83                                                 |
| ESU (Å) <sup>f</sup> ; R <sub>work</sub> /R <sub>free</sub> | 0.171/0.153                     | 0.177/0.156                                           |

<sup>a</sup> Values in parentheses are for the highest resolution shell.

<sup>b</sup>  $R_{\text{merge}} = \frac{\sum_i |I_{\text{hkl},i} - \langle I_{\text{hkl}} \rangle|}{\sum_{\text{hkl}} \sum_i I_{\text{hkl},i}}$ , where  $I$  is the observed intensity and  $\langle I_{\text{hkl}} \rangle$  is the average intensity of multiple measurements.

<sup>c</sup>  $R_{\text{work}} = \frac{\sum ||F_o| - |F_c||}{\sum |F_o|}$ , where  $|F_o|$  is the observed structure factor amplitude, and  $|F_c|$  is the calculated structure factor amplitude.

<sup>d</sup> R<sub>free</sub> is the R factor based on 5% of the data excluded from refinement.

<sup>e</sup> Based on values attained from refinement validation options in COOT (*S11*).

<sup>f</sup> Estimated standard uncertainties generated for R<sub>work</sub> and R<sub>free</sub> in REFMAC5.5 (*S10*).

**Table S2.** Distances between potential redox centers in the MauG-preMADH complex.

| Atom pairs of potential redox centers <sup>a</sup>     | Distance (Å) <sup>b</sup> |
|--------------------------------------------------------|---------------------------|
| <b>5-coord. heme (HEC500)···6-coord. heme (HEC600)</b> |                           |
| Fe···Fe                                                | 21.1                      |
| C3D···C3D (aromatic ring atoms)                        | 14.5                      |
| O1A···O2A (closest approach)                           | 8.7                       |
| <b>5-coord. heme (HEC500)···MauG Trp93</b>             |                           |
| C3D···CD1 (aromatic ring atoms)                        | 5.1                       |
| O2D···CD1 (closest approach)                           | 3.3                       |
| <b>6-coord. heme (HEC600)···MauG Trp93</b>             |                           |
| C3D···CZ3 (aromatic ring atoms)                        | 5.4                       |
| O1D···CZ3 (closest approach)                           | 3.8                       |
| <b>5-coord. heme (HEC500)···β-preMADH Trp108</b>       |                           |
| Fe···CZ3                                               | 40.1                      |
| CHA···CZ3 (aromatic ring atoms)                        | 37.4                      |
| O1A···CZ3 (closest approach)                           | 32.4                      |
| <b>6-coord. heme (HEC600)···β-preMADH Trp108</b>       |                           |
| Fe···CZ3                                               | 19.4                      |
| C3B···CZ3 (aromatic ring atoms)                        | 15.5                      |
| CAB···CZ3 (closest approach)                           | 14.0                      |
| <b>6-coord. heme (HEC600)···MauG Trp199</b>            |                           |
| Fe···CE3 (closest aromatic ring atom to Fe)            | 12.1                      |
| Fe···CB (closest side-chain atom to Fe)                | 11.0                      |
| Fe···C (closest residue atom to Fe)                    | 10.5                      |
| C3B···CE3 (aromatic ring atoms)                        | 8.0                       |
| CAB···CB (closest approach)                            | 5.4                       |
| <b>MauG Trp199···β-preMADH Trp108</b>                  |                           |
| NE1···CH2 (aromatic ring atoms and closest approach)   | 6.5                       |
| NE1···CZ3 (aromatic ring atoms and closest approach)   | 6.5                       |

<sup>a</sup> The 5-coordinate (high-spin) and six-coordinate (low-spin) *c*-type hemes appear as HEC residues in the PDB coordinates.

<sup>b</sup> Distances listed are for one copy of MauG (Chain A) and its corresponding β-preMADH subunit (Chain C). Where applicable the interatomic distances are listed for the closest atom pairing between the two contributing residues.

## REFERENCES

- S1. Y. Wang *et al.*, *Biochemistry* **42**, 7318 (Jun 24, 2003).
- S2. A. R. Pearson *et al.*, *Biochemistry* **43**, 5494 (May 11, 2004).
- S3. R. F. Fischetti *et al.*, *J. Synchrotron Radiation* **16**, 217 (Mar, 2009).
- S4. Z. Otwinowski, W. Minor, *Methods Enzymol.* **276**, 307 (1997).
- S5. R. Sanishvili *et al.*, *Acta Cryst.* **D64**, 425 (Apr, 2008).
- S6. N. Collaborative Computational Project, *Acta Cryst.* **D50**, 760 (1994).
- S7. A. J. McCoy *et al.*, *J. Appl. Crystallogr.* **40**, 658 (Aug 1, 2007).
- S8. H. Shimizu *et al.*, *Biochemistry* **40**, 13483 (Nov 13, 2001).
- S9. G. W. Pettigrew, A. Echaliier, S. R. Pauleta, *J. Inorg. Biochem.* **100**, 551 (Apr, 2006).
- S10. G. N. Murshudov, A. A. Vagin, E. J. Dodson, *Acta Cryst.* **D53**, 240 (May 1, 1997).
- S11. P. Emsley, K. Cowtan, *Acta Cryst.* **D60**, 2126 (Dec, 2004).
- S12. M. D. Winn, M. N. Isupov, G. N. Murshudov, *Acta Cryst.* **D57**, 122 (Jan, 2001).
- S13. X. Li, L. H. Jones, A. R. Pearson, C. M. Wilmot, V. L. Davidson, *Biochemistry* **45**, 13276 (Nov 7, 2006).
